# Supplementary material for: Systematic re-evaluation of the bis(2-hydroxyethyl)disulfide (HEDS) assay reveals an alternative mechanism and activity of glutaredoxins
Source: PubMed Central journal article supplement (PMC5707495; doi:10.1039/c5sc01051a), 2015-05-19
Supplement: SC-006-C5SC01051A-s001.pdf [file SC-006-C5SC01051A-s001.pdf]

## Supplementary Information

### Systematic re-evaluation of the bis(2-hydroxyethyl)disulfide (HEDS) assay reveals an alternative mechanism and activity of glutaredoxins

Patricia Begas, Verena Staudacher, and Marcel Deponte\*

Department of Parasitology, Ruprecht-Karls University, D-69120 Heidelberg, Germany

**Figure S1:**

Alternative evaluation of the HEDS assay kinetics for ScGrx7 (this file)

**Figure S2:**

Comparison of the HEDS and GSSEtOH assay for PfGrx (this file)

**Table S1:**

Apparent kinetic parameters of ScGrx7 with GSH and GSSEtOH (this file)

**Table S2:**

Estimated initial reaction velocities for non-enzymatic reaction 1 (Excel file)

**Table S3:**

Estimated time-dependent concentration of GSH and GSSEtOH (Excel file)

**Table S4:**

Comparison of measured reaction velocities in the HEDS and GSSEtOH assay (Excel file)

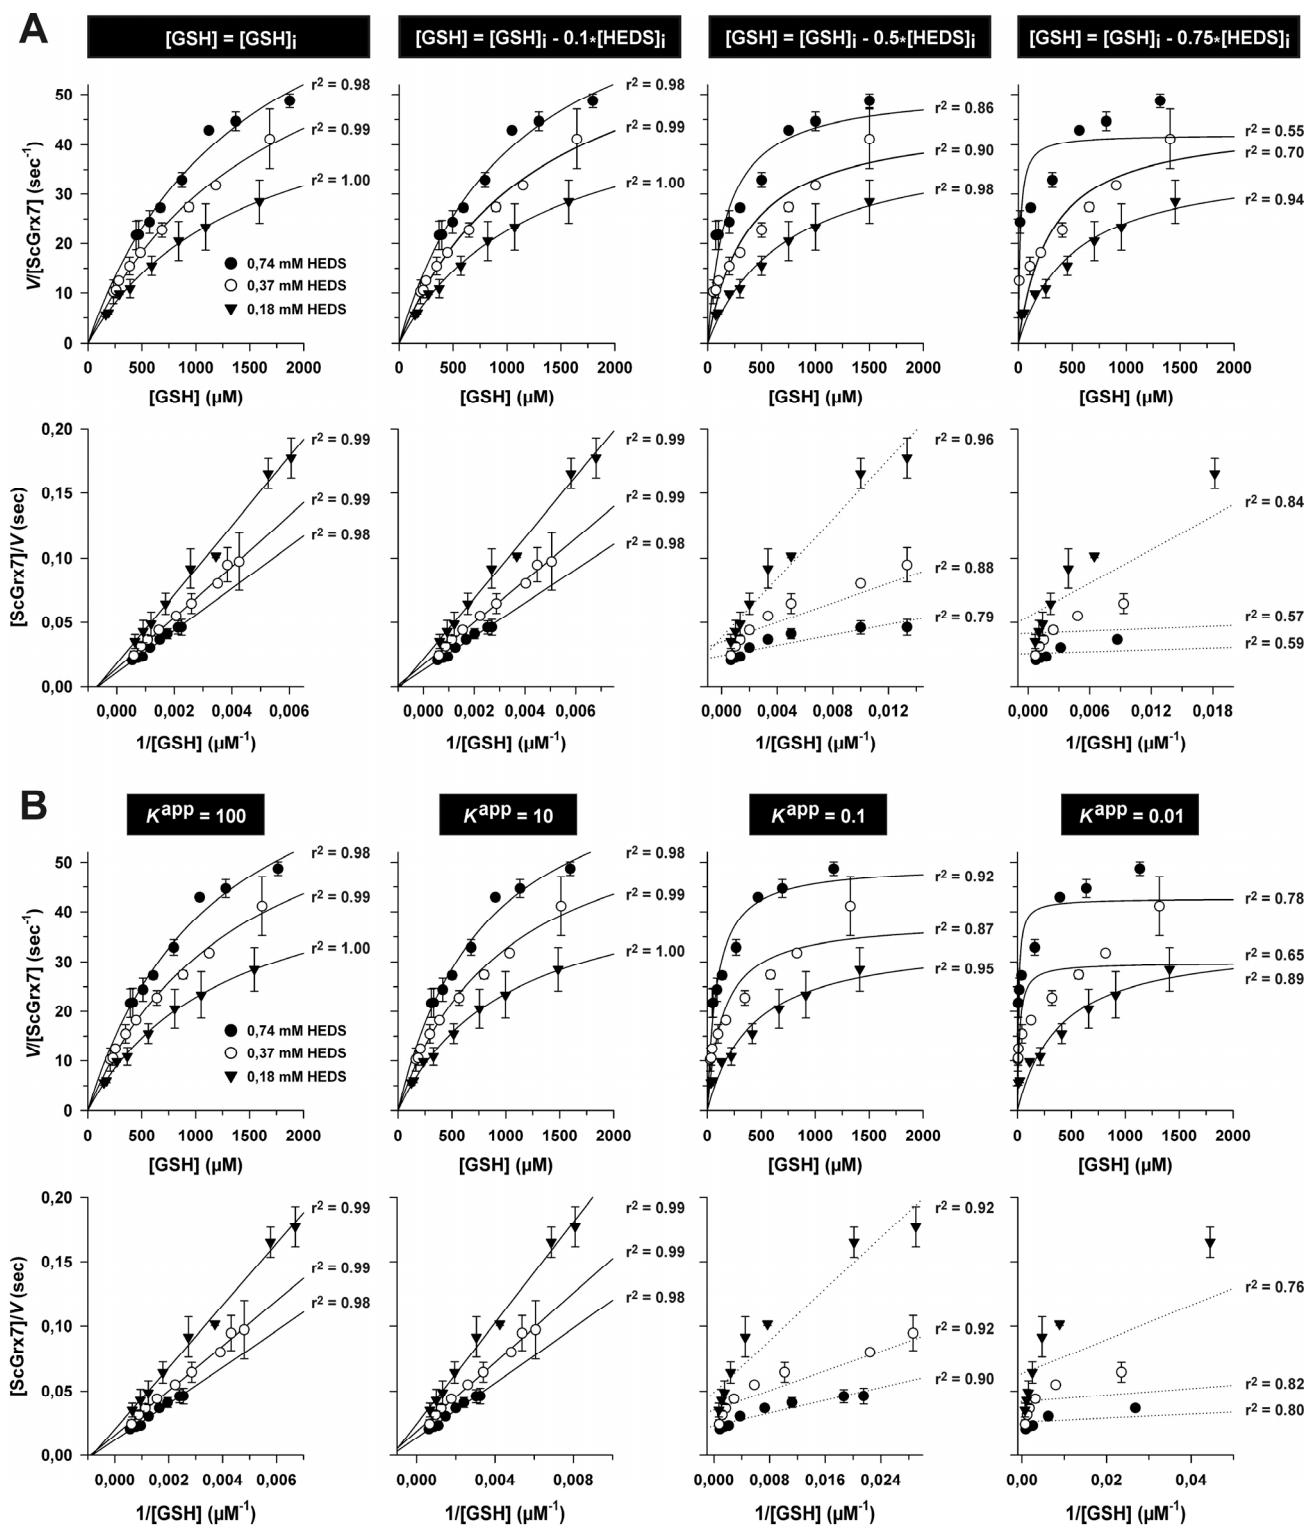

**Figure S1.** Alternative evaluation of the steady-state kinetics obtained for ScGrx7 in the HEDS assay at three different HEDS and variable GSH concentrations. In both panels, direct and Lineweaver-Burk plots are shown in the upper and lower row, respectively. (A) The concentration of GSH plotted on the x-axis was adjusted assuming a conversion of different amounts of HEDS in reaction 1 before the assay was started by the addition of ScGrx7.  $[GSH]_i$  and  $[HEDS]_i$  indicate the initial concentrations before pre-incubation. Representative plots for a putative conversion of 0, 10, 50 or 75% HEDS are shown from left to right. (B) The concentration of GSH was calculated using equation 1 based on hypothetical equilibrium constants. Representative plots for  $K^{app}$  values of 100, 10, 0.1 or 0.01 are shown from left to right. Values for each data point in panels A and B were averaged from two independent experiments.

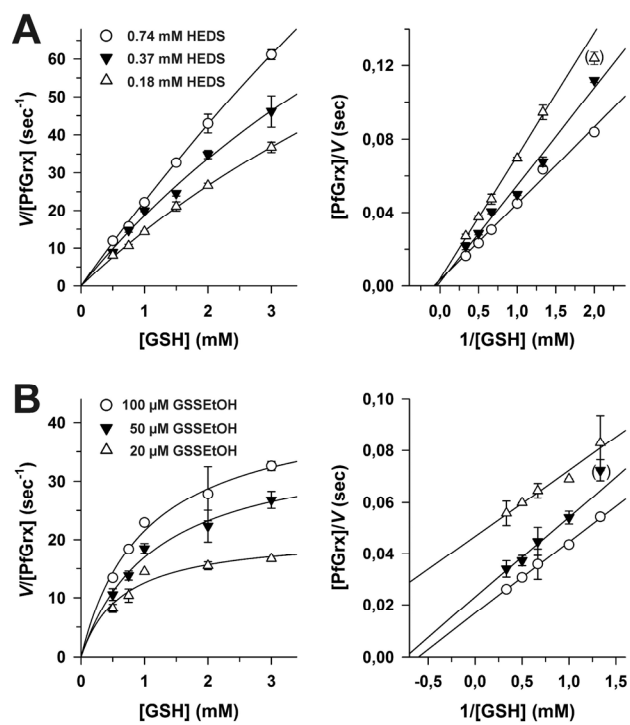

**Figure S2.** Comparison of the HEDS and GSSEtOH assay for PfGrx. (A) GSH-dependent steady-state kinetics for PfGrx at variable HEDS concentrations. (B) GSH-dependent steady-state kinetics for PfGrx at variable GSSEtOH concentrations. Data points were averaged from replicate measurements of a single protein purification and fitted according to Michaelis-Menten and Lineweaver-Burk theory in the left and right panels, respectively.

**Table S1.** Apparent kinetic parameters of ScGrx7 with GSH and GSSEtOH.

| [GSH]<br>( $\mu\text{M}$ ) | [GSSEtOH]<br>( $\mu\text{M}$ ) | $k_{\text{cat}}^{\text{app}}$<br>( $\text{s}^{-1}$ ) | $K_{\text{m}}^{\text{app}}$<br>( $\mu\text{M}$ ) | $k_{\text{cat}}^{\text{app}}/K_{\text{m}}^{\text{app}}$<br>( $\mu\text{M}^{-1}\text{s}^{-1}$ ) |
|----------------------------|--------------------------------|------------------------------------------------------|--------------------------------------------------|------------------------------------------------------------------------------------------------|
| variable                   | 25                             | $4.7 \pm 0.1$                                        | $11.8 \pm 1.0^{\text{a}}$                        | $0.40^{\text{a}}$                                                                              |
| variable                   | 50                             | $10.2 \pm 0.2$                                       | $33.1 \pm 4.9^{\text{a}}$                        | $0.31^{\text{a}}$                                                                              |
| variable                   | 100                            | $19.4 \pm 0.3$                                       | $53.2 \pm 4.6^{\text{a}}$                        | $0.37^{\text{a}}$                                                                              |
| variable                   | 150                            | $28.0 \pm 0.5$                                       | $62.5 \pm 5.1^{\text{a}}$                        | $0.45^{\text{a}}$                                                                              |
| 50                         | variable                       | $24.2 \pm 4.2$                                       | $136 \pm 40^{\text{b}}$                          | $0.18^{\text{b}}$                                                                              |
| 100                        | variable                       | $37.7 \pm 0.9$                                       | $196 \pm 7^{\text{b}}$                           | $0.19^{\text{b}}$                                                                              |
| 200                        | variable                       | $88.6 \pm 18$                                        | $467 \pm 120^{\text{b}}$                         | $0.19^{\text{b}}$                                                                              |
| 300                        | variable                       | $163 \pm 34$                                         | $853 \pm 221^{\text{b}}$                         | $0.19^{\text{b}}$                                                                              |
| 500                        | variable                       | $244 \pm 35$                                         | $1291 \pm 211^{\text{b}}$                        | $0.19^{\text{b}}$                                                                              |
| 1000                       | variable                       | $708 \pm 83$                                         | $3687 \pm 466^{\text{b}}$                        | $0.19^{\text{b}}$                                                                              |

<sup>a</sup>  $K_{\text{m}}^{\text{app}}_{(\text{GSH})}$  and  $k_{\text{cat}}^{\text{app}}/K_{\text{m}}^{\text{app}}_{(\text{GSH})}$

<sup>b</sup>  $K_{\text{m}}^{\text{app}}_{(\text{GSSEtOH})}$  and  $k_{\text{cat}}^{\text{app}}/K_{\text{m}}^{\text{app}}_{(\text{GSSEtOH})}$
