# Supplementary material for: Systematic re-evaluation of the bis(2-hydroxyethyl)disulfide (HEDS) assay reveals an alternative mechanism and activity of glutaredoxins
Source: Chem Sci. 2015 May 19;6(7):3788–96. doi: 10.1039/c5sc01051a (PMC5707495; doi:10.1039/c5sc01051a)
Supplement: Supplementary file 2 [file SC-006-C5SC01051A-s002.xlsx]

## Sheet: Tabelle1
	Table S2 Estimated initial reaction velocities for non-enzymatic reaction 1 based on the rate contant kobs = 0.63 M-1s-1 and v = k[GSH]i[HEDS]i.
	The amounts of HEDS and GSH after pre-incubation were estimated using the calculated initial reaction velocity.
	[HEDS]i	[GSH]i	v (calc.)	[GSH]2min	[HEDS]2min	[HEDS]i	[GSH]i	v (calc.)	[GSH]2min	[HEDS]2min	[HEDS]i	[GSH]i	v (calc.)	[GSH]2min	[HEDS]2min
	(mM)	(mM)	(µM/min)	(%)	(%)	(mM)	(mM)	(µM/min)	(%)	(%)	(mM)	(mM)	(µM/min)	(%)	(%)
	0.74	0.1	2.7972	94.4056	99.244	0.37	0.1	1.3986	97.2028	99.244	0.18	0.1	0.6804	98.6392	99.244
	0.74	0.2	5.5944	94.4056	98.488	0.37	0.2	2.7972	97.2028	98.488	0.18	0.2	1.3608	98.6392	98.488
	0.74	0.3	8.3916	94.4056	97.732	0.37	0.3	4.1958	97.2028	97.732	0.18	0.3	2.0412	98.6392	97.732
	0.74	0.4	11.1888	94.4056	96.976	0.37	0.4	5.5944	97.2028	96.976	0.18	0.4	2.7216	98.6392	96.976
	0.74	0.5	13.986	94.4056	96.22	0.37	0.5	6.993	97.2028	96.22	0.18	0.5	3.402	98.6392	96.22
	0.74	0.6	16.7832	94.4056	95.464	0.37	0.6	8.3916	97.2028	95.464	0.18	0.6	4.0824	98.6392	95.464
	0.74	0.7	19.5804	94.4056	94.708	0.37	0.7	9.7902	97.2028	94.708	0.18	0.7	4.7628	98.6392	94.708
	0.74	0.8	22.3776	94.4056	93.952	0.37	0.8	11.1888	97.2028	93.952	0.18	0.8	5.4432	98.6392	93.952
	0.74	0.9	25.1748	94.4056	93.196	0.37	0.9	12.5874	97.2028	93.196	0.18	0.9	6.1236	98.6392	93.196
	0.74	1	27.972	94.4056	92.44	0.37	1	13.986	97.2028	92.44	0.18	1	6.804	98.6392	92.44
	0.74	1.1	30.7692	94.4056	91.684	0.37	1.1	15.3846	97.2028	91.684	0.18	1.1	7.4844	98.6392	91.684
	0.74	1.2	33.5664	94.4056	90.928	0.37	1.2	16.7832	97.2028	90.928	0.18	1.2	8.1648	98.6392	90.928
	0.74	1.4	39.1608	94.4056	89.416	0.37	1.4	19.5804	97.2028	89.416	0.18	1.4	9.5256	98.6392	89.416
	0.74	1.5	41.958	94.4056	88.66	0.37	1.5	20.979	97.2028	88.66	0.18	1.5	10.206	98.6392	88.66
	0.74	1.6	44.7552	94.4056	87.904	0.37	1.6	22.3776	97.2028	87.904	0.18	1.6	10.8864	98.6392	87.904
	0.74	1.7	47.5524	94.4056	87.148	0.37	1.7	23.7762	97.2028	87.148	0.18	1.7	11.5668	98.6392	87.148
	0.74	1.9	53.1468	94.4056	85.636	0.37	1.9	26.5734	97.2028	85.636	0.18	1.9	12.9276	98.6392	85.636
	0.74	2	55.944	94.4056	84.88	0.37	2	27.972	97.2028	84.88	0.18	2	13.608	98.6392	84.88
	0.74	3	83.916	94.4056	77.32	0.37	3	41.958	97.2028	77.32	0.18	3	20.412	98.6392	77.32
	0.74	4	111.888	94.4056	69.76	0.37	4	55.944	97.2028	69.76	0.18	4	27.216	98.6392	69.76
	0.74	5	139.86	94.4056	62.2	0.37	5	69.93	97.2028	62.2	0.18	5	34.02	98.6392	62.2
	[HEDS]i	[GSH]i	v (calc.)	[GSH]2min	[HEDS]2min	[HEDS]i	[GSH]i	v (calc.)	[GSH]2min	[HEDS]2min	[HEDS]i	[GSH]i	v (calc.)	[GSH]2min	[HEDS]2min
	(mM)	(mM)	(µM/min)	(%)	(%)	(mM)	(mM)	(µM/min)	(%)	(%)	(mM)	(mM)	(µM/min)	(%)	(%)
	0.1845	2	13.9482	98.6052	84.88	0.1845	1	6.9741	98.6052	92.44	0.1845	0.1	0.69741	98.6052	99.244
	0.369	2	27.8964	97.2104	84.88	0.369	1	13.9482	97.2104	92.44	0.369	0.1	1.39482	97.2104	99.244
	0.5535	2	41.8446	95.8155	84.88	0.5535	1	20.9223	95.8155	92.44	0.5535	0.1	2.09223	95.8155	99.244
	0.738	2	55.7928	94.4207	84.88	0.738	1	27.8964	94.4207	92.44	0.738	0.1	2.78964	94.4207	99.244
	0.9225	2	69.741	93.0259	84.88	0.9225	1	34.8705	93.0259	92.44	0.9225	0.1	3.48705	93.0259	99.244
	1.107	2	83.6892	91.6311	84.88	1.107	1	41.8446	91.6311	92.44	1.107	0.1	4.18446	91.6311	99.244
	1.2915	2	97.6374	90.2363	84.88	1.2915	1	48.8187	90.2363	92.44	1.2915	0.1	4.88187	90.2363	99.244
	1.476	2	111.586	88.8414	84.88	1.476	1	55.7928	88.8414	92.44	1.476	0.1	5.57928	88.8414	99.244
	2.214	2	167.378	83.2622	84.88	2.214	1	83.6892	83.2622	92.44	2.214	0.1	8.36892	83.2622	99.244
	2.214	2	167.378	83.2622	84.88	2.214	1	83.6892	83.2622	92.44	2.214	0.1	8.36892	83.2622	99.244
	2.952	2	223.171	77.6829	84.88	2.952	1	111.586	77.6829	92.44	2.952	0.1	11.1586	77.6829	99.244
	3.69	2	278.964	72.1036	84.88	3.69	1	139.482	72.1036	92.44	3.69	0.1	13.9482	72.1036	99.244
