# Supplementary material for: Systematic re-evaluation of the bis(2-hydroxyethyl)disulfide (HEDS) assay reveals an alternative mechanism and activity of glutaredoxins
Source: Chem Sci. 2015 May 19;6(7):3788–96. doi: 10.1039/c5sc01051a (PMC5707495; doi:10.1039/c5sc01051a)
Supplement: Supplementary file 3 [file SC-006-C5SC01051A-s003.xlsx]

## Sheet: Tabelle1
	Table S3 Estimated time-dependent concentration of GSH and GSSEtOH for non-enzymatic reaction 1 based on the rate contant kobs = 0.63 M-1s-1 and v = k[GSH]i[HEDS]i.
					2 min pre-incubation			4 min pre-incubation			6 min pre-incubation			8 min pre-incubation
	[HEDS]i	[GSH]i	v (calc.)	[GSH]2min	[GSH]2min	[GSSEtOH]2min	[GSH]4min	[GSH]4min	[GSSEtOH]4min	[GSH]6min	[GSH]6min	[GSSEtOH]6min	[GSH]8min	[GSH]8min	[GSSEtOH]8min
	(mM)	(mM)	(µM/min)	(%)	(mM)	(mM)	(%)	(mM)	(mM)	(%)	(mM)	(mM)	(%)	(mM)	(mM)
	0.74	0.1	2.7972	94.4056	0.0944056	0.0055944	88.8112	0.0888112	0.0111888	83.2168	0.0832168	0.0167832	77.6224	0.0776224	0.0223776
	0.74	0.2	5.5944	94.4056	0.188811	0.0111888	88.8112	0.177622	0.0223776	83.2168	0.166434	0.0335664	77.6224	0.155245	0.0447552
	0.74	0.3	8.3916	94.4056	0.283217	0.0167832	88.8112	0.266434	0.0335664	83.2168	0.24965	0.0503496	77.6224	0.232867	0.0671328
	0.74	0.4	11.1888	94.4056	0.377622	0.0223776	88.8112	0.355245	0.0447552	83.2168	0.332867	0.0671328	77.6224	0.31049	0.0895104
	0.74	0.5	13.986	94.4056	0.472028	0.027972	88.8112	0.444056	0.055944	83.2168	0.416084	0.083916	77.6224	0.388112	0.111888
	0.74	0.6	16.7832	94.4056	0.566434	0.0335664	88.8112	0.532867	0.0671328	83.2168	0.499301	0.100699	77.6224	0.465734	0.134266
	0.74	0.7	19.5804	94.4056	0.660839	0.0391608	88.8112	0.621678	0.0783216	83.2168	0.582518	0.117482	77.6224	0.543357	0.156643
	0.74	0.8	22.3776	94.4056	0.755245	0.0447552	88.8112	0.71049	0.0895104	83.2168	0.665734	0.134266	77.6224	0.620979	0.179021
	0.74	0.9	25.1748	94.4056	0.84965	0.0503496	88.8112	0.799301	0.100699	83.2168	0.748951	0.151049	77.6224	0.698602	0.201398
	0.74	1	27.972	94.4056	0.944056	0.055944	88.8112	0.888112	0.111888	83.2168	0.832168	0.167832	77.6224	0.776224	0.223776
	0.74	1.1	30.7692	94.4056	1.03846	0.0615384	88.8112	0.976923	0.123077	83.2168	0.915385	0.184615	77.6224	0.853846	0.246154
	0.74	1.2	33.5664	94.4056	1.13287	0.0671328	88.8112	1.06573	0.134266	83.2168	0.998602	0.201398	77.6224	0.931469	0.268531
	0.74	1.4	39.1608	94.4056	1.32168	0.0783216	88.8112	1.24336	0.156643	83.2168	1.16504	0.234965	77.6224	1.08671	0.313286
	0.74	1.5	41.958	94.4056	1.41608	0.083916	88.8112	1.33217	0.167832	83.2168	1.24825	0.251748	77.6224	1.16434	0.335664
	0.74	1.6	44.7552	94.4056	1.51049	0.0895104	88.8112	1.42098	0.179021	83.2168	1.33147	0.268531	77.6224	1.24196	0.358042
	0.74	1.7	47.5524	94.4056	1.6049	0.0951048	88.8112	1.50979	0.19021	83.2168	1.41469	0.285314	77.6224	1.31958	0.380419
	0.74	1.9	53.1468	94.4056	1.79371	0.106294	88.8112	1.68741	0.212587	83.2168	1.58112	0.318881	77.6224	1.47483	0.425174
	0.74	2	55.944	94.4056	1.88811	0.111888	88.8112	1.77622	0.223776	83.2168	1.66434	0.335664	77.6224	1.55245	0.447552
	0.74	3	83.916	94.4056	2.83217	0.167832	88.8112	2.66434	0.335664	83.2168	2.4965	0.503496	77.6224	2.32867	0.671328
	0.74	4	111.888	94.4056	3.77622	0.223776	88.8112	3.55245	0.447552	83.2168	3.32867	0.671328	77.6224	3.1049	0.895104
	0.74	5	139.86	94.4056	4.72028	0.27972	88.8112	4.44056	0.55944	83.2168	4.16084	0.83916	77.6224	3.88112	1.11888
