# Supplementary material for: Systematic re-evaluation of the bis(2-hydroxyethyl)disulfide (HEDS) assay reveals an alternative mechanism and activity of glutaredoxins
Source: Chem Sci. 2015 May 19;6(7):3788–96. doi: 10.1039/c5sc01051a (PMC5707495; doi:10.1039/c5sc01051a)
Supplement: Supplementary file 4 [file SC-006-C5SC01051A-s004.xlsx]

## Sheet: Tabelle1
	Table S4 Comparison of the measured reaction velocities in the HEDS and GSSEtOH assay using calculated GSSEtOH concentrations based on a non-enzymatic reaction 1
	[HEDS]i	[GSH]i	v (calc.)	[GSH]2min	[GSH]2min	[GSSEtOH]2min	v/[E] HEDS assay	v/[E] GSSEtOH assay		v/[E]HEDS assay
	(mM)	(mM)	(µM/min)	(%)	(mM)	(mM)	(sec-1)	(sec-1)		v/[E]GSSEtOH assay
	0.18	0.165	1.12266	98.6392	0.162755	0.00224532	5.6404
	0.18	0.19	1.29276	98.6392	0.187414	0.00258552	6.0557
	0.18	0.29	1.97316	98.6392	0.286054	0.00394632	9.8325
	0.18	0.39	2.65356	98.6392	0.384693	0.00530712	10.8896
	0.18	0.59	4.01436	98.6392	0.581971	0.00802872	15.5171
	0.18	0.84	5.71536	98.6392	0.828569	0.0114307	20.548
	0.18	1.09	7.41636	98.6392	1.07517	0.0148327	23.3414
	0.18	1.59	10.8184	98.6392	1.56836	0.0216367	28.5102	4,6 ± 1,0	@ 1,5 mM GSH + 25 µM GSSEtOH	6.19565
	0.37	0.26	3.63636	97.2028	0.252727	0.00727272	10.552
	0.37	0.285	3.98601	97.2028	0.277028	0.00797202	12.4732
	0.37	0.385	5.38461	97.2028	0.374231	0.0107692	15.4689
	0.37	0.485	6.78321	97.2028	0.471434	0.0135664	18.194
	0.37	0.685	9.58041	97.2028	0.665839	0.0191608	22.7613
	0.37	0.935	13.0769	97.2028	0.908846	0.0261538	27.4102	4,8 ± 1,0	@ 1,0 mM GSH + 25 µM GSSEtOH	5.70833
	0.37	1.185	16.5734	97.2028	1.15185	0.0331468	31.7926
	0.37	1.685	23.5664	97.2028	1.63787	0.0471328	41.1442	9,1 ± 1,3	@ 1,5 mM GSH + 50 µM GSSEtOH	4.51648
	0.74	0.445	12.4475	94.4056	0.420105	0.0248951	21.676
	0.74	0.47	13.1468	94.4056	0.443706	0.0262937	21.7658	4,6 ± 1,0	@ 0,5 mM GSH + 25 µM GSSEtOH	4.73913
	0.74	0.57	15.944	94.4056	0.538112	0.0318881	24.3958
	0.74	0.67	18.7412	94.4056	0.632518	0.0374825	27.2655
	0.74	0.87	24.3356	94.4056	0.821329	0.0486713	32.9046	9,6 ± 1,1	@ 1,0 mM GSH + 50 µM GSSEtOH	3.42708
	0.74	1.12	31.3286	94.4056	1.05734	0.0626573	42.9126
	0.74	1.37	38.3216	94.4056	1.29336	0.0766433	44.6677
	0.74	1.87	52.3076	94.4056	1.76538	0.104615	48.7272	18,8 ± 2,0	@ 1,5 mM GSH + 100 µM GSSEtOH	2.59043
